# Supplementary material
Source: PubMed Central journal article supplement (PMC122180)
Supplement: pnas_032522499_1.pdf [file pnas_032522499_1.pdf]

**Table 2. Characteristics of analyzed protein structures**

| PDB  | Protein                        | <i>N</i> | Cofactors                          | <i>T</i> , K | Res., Å | <i>R</i> factor |
|------|--------------------------------|----------|------------------------------------|--------------|---------|-----------------|
| 1RB9 | Rubredoxin                     | 52       | Fe                                 | 293          | 0.92    | 0.073           |
| 2FDN | Ferredoxin                     | 55       | 2 x Fe <sub>4</sub> S <sub>4</sub> | 100          | 0.94    | 0.100           |
| 2KNT | Kunitz-type domain C5          | 58       | –                                  | 291          | 1.20    | 0.149           |
| 2IGD | Protein G Igg domain III       | 61       | –                                  | 300          | 1.10    | 0.097           |
| 1G2B | Spectrin $\alpha$ chain        | 62       | –                                  | 100          | 1.12    | 0.148           |
| 1F94 | Bucandin                       | 63       | –                                  | 100          | 0.97    | 0.123           |
| 1HG7 | Type III antifreeze protein    | 66       | –                                  | 110          | 1.15    | 0.120           |
| 1C9O | Cold-shock protein             | 66       | –                                  | 100          | 1.17    | 0.125           |
| 1C75 | Cytochrome c553                | 71       | Heme                               | 100          | 0.97    | 0.116           |
| 1CC8 | Metallochaperone Atx1          | 72       | Hg                                 | 95           | 1.02    | 0.141           |
| 1B0Y | Hipip                          | 85       | Fe <sub>4</sub> S <sub>4</sub>     | 100          | 0.93    | 0.155           |
| 1CTJ | Cytochrome c6                  | 89       | Heme                               | 293          | 1.10    | 0.140           |
| 1C5E | $\lambda$ phage head protein D | 95       | –                                  | 100          | 1.10    | 0.098           |
| 1RGE | Guanyloribonuclease            | 96       | 2GP                                | 293          | 1.15    | 0.109           |
| 1PSR | Psoriasin                      | 100      | –                                  | 100          | 1.05    | 0.109           |
| 1JHG | trp repressor                  | 101      | trp                                | 287          | 1.30    | 0.127           |
| 2PVB | Parvalbumin                    | 107      | 2 x Ca                             | 100          | 0.91    | 0.110           |
| 1DY5 | Ribonuclease A                 | 124      | –                                  | 100          | 0.87    | 0.101           |

|      |                              |     |                                |     |      |       |
|------|------------------------------|-----|--------------------------------|-----|------|-------|
| 3LZT | Lysozyme (HEW)               | 129 | –                              | 120 | 0.92 | 0.092 |
| 1CXQ | Sarcoma virus integrase      | 143 | EPE                            | 95  | 1.02 | 0.129 |
| 1QDD | Lithostathine                | 144 | Trisaccharide                  | 298 | 1.30 | 0.132 |
| 1A6M | oxy-myoglobin (SW)           | 151 | Heme, O <sub>2</sub>           | 100 | 1.00 | 0.127 |
| 1MFM | Superoxide dismutase         | 153 | Zn, Cu                         | 100 | 1.02 | 0.118 |
| 1EQO | Pyrophosphokinase            | 158 | 2 x Mg, APC, HHP               | 100 | 1.25 | 0.114 |
| 1CEX | Cutinase                     | 197 | –                              | 100 | 1.00 | 0.094 |
| 1G66 | Acetylxylylan esterase       | 207 | –                              | 85  | 0.90 | 0.107 |
| 1MUN | Adenine glycosylase          | 225 | Fe <sub>4</sub> S <sub>4</sub> | 90  | 1.20 | 0.124 |
| 1FCY | Retinoic acid receptor       | 236 | 564, LMU                       | 100 | 1.30 | 0.134 |
| 1QL0 | Endonulcease (S. m.)         | 241 | –                              | 120 | 1.10 | 0.128 |
| 1QJ4 | Hydroxynitrile lyase         | 256 | –                              | 120 | 1.10 | 0.116 |
| 1GCI | Subtilisin                   | 269 | Ca                             | 100 | 0.78 | 0.101 |
| 1DCS | Ring expandase               | 279 | –                              | 90  | 1.30 | 0.129 |
| 1QTW | Endonuclease IV              | 285 | 3 x Zn                         | 100 | 1.02 | 0.124 |
| 1IXH | Phosphate-binding<br>protein | 321 | PO <sub>4</sub>                | 100 | 0.98 | 0.117 |
| 1BXO | Penicillopepsin              | 323 | PP7                            | 100 | 0.95 | 0.100 |
| 1BG6 | Haloalkane<br>dehalogenase   | 349 | –                              | 100 | 1.15 | 0.105 |
| 1C0P | D-amino acid oxidase         | 363 | FAD, DAL, PER                  | 100 | 1.20 | 0.125 |
| 3SIL | Sialidase                    | 379 | –                              | 100 | 1.05 | 0.116 |

---

PDB, Protein Data Bank identification code; *N*, number of residues; Res., resolution.
