# Supplementary material
Source: PubMed Central journal article supplement (PMC122180)
Supplement: pnas_032522499_3.pdf [file pnas_032522499_3.pdf]

Supporting information for Halle (January 29, 2002) *Proc. Natl. Acad. Sci. USA*,  
10.1073/pnas.032522499.

**Table 3. Quality indicators for model predictions of AMSD profiles for set of 38 nonhomologous proteins**

| PDB  | Density based on C $\alpha$ atoms |      |        |      | Density based on nonhydrogen atoms (LDM) |                      |                      |                      |                      |                      |
|------|-----------------------------------|------|--------|------|------------------------------------------|----------------------|----------------------|----------------------|----------------------|----------------------|
|      | $\Delta$                          |      | $\rho$ |      | $\Delta$                                 |                      |                      | $\rho$               |                      |                      |
|      | LDM*                              | GNM  | LDM*   | GNM  | ref/fix <sup>†</sup>                     | ref/scd <sup>†</sup> | xtl/scd <sup>†</sup> | ref/fix <sup>†</sup> | ref/scd <sup>†</sup> | xtl/scd <sup>†</sup> |
| 1RB9 | 1.31                              | 1.57 | 0.42   | 0.34 | 1.25                                     | 1.21                 | 0.88                 | 0.41                 | 0.43                 | 0.52                 |
| 2FDN | 1.24                              | 1.32 | 0.57   | 0.53 | 1.08                                     | 1.05                 | 0.74                 | 0.53                 | 0.54                 | 0.71                 |
| 2KNT | 0.80                              | 0.74 | 0.62   | 0.78 | 0.68                                     | 0.64                 | 0.67                 | 0.75                 | 0.76                 | 0.71                 |
| 2IGD | 1.07                              | 1.22 | 0.48   | 0.60 | 0.98                                     | 0.98                 | 0.53                 | 0.53                 | 0.55                 | 0.83                 |
| 1G2B | 1.06                              | 1.20 | 0.67   | 0.66 | 1.08                                     | 1.07                 | 0.70                 | 0.69                 | 0.69                 | 0.74                 |
| 1F94 | 2.32                              | 3.06 | 0.60   | 0.53 | 2.19                                     | 2.09                 | 1.13                 | 0.63                 | 0.65                 | 0.71                 |
| 1HG7 | 1.02                              | 1.11 | 0.62   | 0.70 | 0.81                                     | 0.80                 | 0.70                 | 0.60                 | 0.63                 | 0.69                 |
| 1C9O | 1.38                              | 1.74 | 0.52   | 0.54 | 1.39                                     | 1.36                 | 0.77                 | 0.55                 | 0.58                 | 0.71                 |
| 1C75 | 1.18                              | 1.64 | 0.52   | 0.24 | 1.02                                     | 0.94                 | 0.71                 | 0.64                 | 0.67                 | 0.73                 |
| 1CC8 | 1.13                              | 1.11 | 0.55   | 0.55 | 0.98                                     | 0.92                 | 0.55                 | 0.63                 | 0.64                 | 0.84                 |
| 1B0Y | 0.82                              | 0.86 | 0.70   | 0.70 | 0.72                                     | 0.71                 | 0.70                 | 0.75                 | 0.76                 | 0.75                 |
| 1CTJ | 1.04                              | 1.25 | 0.42   | 0.27 | 0.92                                     | 0.88                 | 0.75                 | 0.51                 | 0.54                 | 0.56                 |
| 1C5E | 0.80                              | 0.98 | 0.61   | 0.62 | 0.87                                     | 0.82                 | 0.74                 | 0.59                 | 0.62                 | 0.72                 |
| 1RGE | 1.04                              | 1.33 | 0.66   | 0.54 | 0.93                                     | 0.94                 | 0.70                 | 0.66                 | 0.67                 | 0.74                 |
| 1PSR | 0.71                              | 0.78 | 0.54   | 0.53 | 0.72                                     | 0.71                 | 0.73                 | 0.59                 | 0.61                 | 0.57                 |
| 1JHG | 0.99                              | 1.28 | 0.52   | 0.05 | 0.86                                     | 0.85                 | 0.70                 | 0.54                 | 0.55                 | 0.71                 |
| 2PVB | 1.13                              | 1.36 | 0.52   | 0.42 | 1.08                                     | 1.05                 | 0.91                 | 0.58                 | 0.58                 | 0.57                 |

|      |      |      |      |      |      |      |      |      |      |      |
|------|------|------|------|------|------|------|------|------|------|------|
| 1DY5 | 1.05 | 1.05 | 0.54 | 0.63 | 1.01 | 0.97 | 0.71 | 0.55 | 0.56 | 0.64 |
| 3LZT | 0.79 | 0.76 | 0.63 | 0.72 | 0.76 | 0.74 | 0.78 | 0.66 | 0.68 | 0.59 |
| 1CXQ | 0.70 | 0.80 | 0.55 | 0.40 | 0.66 | 0.65 | 0.58 | 0.60 | 0.62 | 0.74 |
| 1QDD | 0.69 | 0.77 | 0.69 | 0.76 | 0.65 | 0.63 | 0.67 | 0.76 | 0.78 | 0.83 |
| 1A6M | 0.83 | 0.78 | 0.60 | 0.67 | 0.85 | 0.82 | 0.86 | 0.54 | 0.57 | 0.49 |
| 1MFM | 0.91 | 0.96 | 0.48 | 0.46 | 0.82 | 0.80 | 0.72 | 0.58 | 0.59 | 0.72 |
| 1EQO | 0.94 | 0.97 | 0.52 | 0.61 | 0.84 | 0.82 | 0.83 | 0.55 | 0.59 | 0.59 |
| 1CEX | 0.73 | 0.69 | 0.73 | 0.80 | 0.67 | 0.66 | 0.65 | 0.80 | 0.81 | 0.85 |
| 1G66 | 0.76 | 0.84 | 0.63 | 0.66 | 0.70 | 0.69 | 0.63 | 0.69 | 0.70 | 0.76 |
| 1MUN | 0.87 | 1.06 | 0.52 | 0.34 | 0.81 | 0.77 | 0.70 | 0.56 | 0.60 | 0.70 |
| 1FCY | 0.85 | 0.88 | 0.66 | 0.68 | 0.77 | 0.72 | 0.65 | 0.68 | 0.72 | 0.74 |
| 1QL0 | 0.75 | 0.78 | 0.69 | 0.73 | 0.63 | 0.62 | 0.54 | 0.74 | 0.76 | 0.82 |
| 1QJ4 | 1.03 | 1.16 | 0.58 | 0.63 | 0.96 | 0.92 | 0.80 | 0.61 | 0.63 | 0.67 |
| 1GCI | 0.99 | 0.96 | 0.69 | 0.77 | 0.75 | 0.72 | 0.63 | 0.73 | 0.75 | 0.76 |
| 1DCS | 0.89 | 0.97 | 0.49 | 0.52 | 0.86 | 0.84 | 0.68 | 0.49 | 0.51 | 0.67 |
| 1QTW | 0.81 | 0.84 | 0.58 | 0.62 | 0.78 | 0.75 | 0.77 | 0.64 | 0.68 | 0.68 |
| 1IXH | 0.85 | 0.82 | 0.59 | 0.70 | 0.81 | 0.79 | 0.76 | 0.66 | 0.68 | 0.70 |
| 1BXO | 0.84 | 0.87 | 0.70 | 0.79 | 0.79 | 0.76 | 0.71 | 0.76 | 0.78 | 0.78 |
| 1BG6 | 0.83 | 0.91 | 0.52 | 0.51 | 0.79 | 0.77 | 0.79 | 0.55 | 0.59 | 0.61 |
| 1C0P | 0.86 | 0.80 | 0.50 | 0.63 | 0.77 | 0.76 | 0.78 | 0.62 | 0.65 | 0.65 |
| 3SIL | 0.68 | 0.65 | 0.75 | 0.84 | 0.64 | 0.62 | 0.67 | 0.76 | 0.78 | 0.77 |

---

In all calculations, the cutoff radius  $R_c$  was set equal to the distance,  $R_{\alpha\alpha}^{(2)}$ , of the second minimum in the  $C\alpha - C\alpha$  radial density. PDB, Protein Data Bank identification code; LDM, local density model; GNM, Gaussian network model.

\* Contact density is based on  $C\alpha$  atoms in reference molecule and calculated with self-consistently distributed atoms.

† Contact density is based on nonhydrogen atoms in reference molecule (ref) or entire crystal (xtl) and is calculated with fixed (fix) or self-consistently distributed (scd) atoms.
